# Supplementary material for: Adrenergic ligands that block oviposition in the cattle tick Rhipicephalus microplus affect ovary contraction
Source: PubMed Central journal article supplement (PMC4601016; doi:10.1038/srep15109), 2015-10-12
Supplement: srep15109-s1.pdf [file srep15109-s1.pdf]

## Adrenergic ligands that block oviposition in the cattle tick *Rhipicephalus microplus* affect ovary contraction

Raquel Cossío-Bayúgar , Estefan Miranda-Miranda , Manuel Fernández-Rubalcaba , Verónica Narváez-Padilla and Enrique Reynaud

### S1-ANOVA whole curve

|                                                                   |                 |    |    |              |         |  |  |  |
|-------------------------------------------------------------------|-----------------|----|----|--------------|---------|--|--|--|
|                                                                   |                 |    |    |              |         |  |  |  |
| Whole curve                                                       |                 |    |    |              |         |  |  |  |
| ANOVA summary                                                     |                 |    |    |              |         |  |  |  |
| F                                                                 | 353             |    |    |              |         |  |  |  |
| P value                                                           | < 0.0001        |    |    |              |         |  |  |  |
| P value summary                                                   | ****            |    |    |              |         |  |  |  |
| Are differences among means statistically significant? (P < 0.05) | Yes             |    |    |              |         |  |  |  |
| R square                                                          | 0.118           |    |    |              |         |  |  |  |
|                                                                   |                 |    |    |              |         |  |  |  |
| Brown-Forsythe test                                               |                 |    |    |              |         |  |  |  |
| F (DFn, DFd)                                                      | 238 (10, 26389) |    |    |              |         |  |  |  |
| P value                                                           | < 0.0001        |    |    |              |         |  |  |  |
| P value summary                                                   | ****            |    |    |              |         |  |  |  |
| Significantly different standard deviations? (P < 0.05)           | Yes             |    |    |              |         |  |  |  |
|                                                                   |                 |    |    |              |         |  |  |  |
| Bartlett's test                                                   |                 |    |    |              |         |  |  |  |
| Bartlett's statistic (corrected)                                  | 2876            |    |    |              |         |  |  |  |
| P value                                                           | < 0.0001        |    |    |              |         |  |  |  |
| P value summary                                                   | ****            |    |    |              |         |  |  |  |
| Significantly different standard deviations? (P < 0.05)           | Yes             |    |    |              |         |  |  |  |
|                                                                   |                 |    |    |              |         |  |  |  |
| ANOVA table                                                       | SS              | DF | MS | F (DFn, DFd) | P value |  |  |  |

|                                     |            |                 |              |                     |            |    |   |    |
|-------------------------------------|------------|-----------------|--------------|---------------------|------------|----|---|----|
| Treatment (between columns)         | 160783     | 10              | 16078        | F (10, 26389) = 353 | P < 0.0001 |    |   |    |
| Residual (within columns)           | 1200000    | 26389           | 45.5         |                     |            |    |   |    |
| Total                               | 1360000    | 26399           |              |                     |            |    |   |    |
|                                     |            |                 |              |                     |            |    |   |    |
| Data summary                        |            |                 |              |                     |            |    |   |    |
| Number of treatments (columns)      | 11         |                 |              |                     |            |    |   |    |
| Number of values (total)            | 26400      |                 |              |                     |            |    |   |    |
|                                     |            |                 |              |                     |            |    |   |    |
|                                     |            |                 |              |                     |            |    |   |    |
| Number of families                  | 1          |                 |              |                     |            |    |   |    |
| Number of comparisons per family    | 10         |                 |              |                     |            |    |   |    |
| Alpha                               | 0.05       |                 |              |                     |            |    |   |    |
|                                     |            |                 |              |                     |            |    |   |    |
| Dunnett's multiple comparisons test | Mean Diff. | 95% CI of diff. | Significant? | Summary             |            |    |   |    |
|                                     |            |                 |              |                     |            |    |   |    |
| DMSO vs. Isoprotenerol              | -2.77      | -3.30 to -2.24  | Yes          | ****                |            |    |   |    |
| DMSO vs. Tyramine                   | 6.16       | 5.63 to 6.69    | Yes          | ****                |            |    |   |    |
| DMSO vs. Salbutamol                 | 5.49       | 4.96 to 6.02    | Yes          | ****                |            |    |   |    |
| DMSO vs. Epinastine                 | 3.13       | 2.60 to 3.66    | Yes          | ****                |            |    |   |    |
| DMSO vs. Clonidine                  | 0.874      | 0.345 to 1.40   | Yes          | ****                |            |    |   |    |
| DMSO vs. Prazosin                   | 4.59       | 4.06 to 5.12    | Yes          | ****                |            |    |   |    |
| DMSO vs. Amitraz                    | 1.54       | 1.01 to 2.07    | Yes          | ****                |            |    |   |    |
| DMSO vs. Octopamine 5µM             | 2.33       | 1.80 to 2.86    | Yes          | ****                |            |    |   |    |
| DMSO vs. Octopamine 1.7µM           | 0.901      | 0.371 to 1.43   | Yes          | ****                |            |    |   |    |
| DMSO vs. Octopamine15µM             | 1.44       | 0.913 to 1.97   | Yes          | ****                |            |    |   |    |
|                                     |            |                 |              |                     |            |    |   |    |
|                                     |            |                 |              |                     |            |    |   |    |
| Test details                        | Mean 1     | Mean 2          | Mean Diff.   | SE of diff.         | n1         | n2 | q | DF |

|                           |      |      |       |       |      |      |      |       |
|---------------------------|------|------|-------|-------|------|------|------|-------|
|                           |      |      |       |       |      |      |      |       |
| DMSO vs. Isoprotenerol    | 94.9 | 97.6 | -2.77 | 0.195 | 2400 | 2400 | 14.2 | 26389 |
| DMSO vs. Tyramine         | 94.9 | 88.7 | 6.16  | 0.195 | 2400 | 2400 | 31.6 | 26389 |
| DMSO vs. Salbutamol       | 94.9 | 89.4 | 5.49  | 0.195 | 2400 | 2400 | 28.2 | 26389 |
| DMSO vs. Epinastine       | 94.9 | 91.7 | 3.13  | 0.195 | 2400 | 2400 | 16.1 | 26389 |
| DMSO vs. Clonidine        | 94.9 | 94   | 0.874 | 0.195 | 2400 | 2400 | 4.49 | 26389 |
| DMSO vs. Prazosin         | 94.9 | 90.3 | 4.59  | 0.195 | 2400 | 2400 | 23.6 | 26389 |
| DMSO vs. Amitraz          | 94.9 | 93.3 | 1.54  | 0.195 | 2400 | 2400 | 7.9  | 26389 |
| DMSO vs. Octopamine 5µM   | 94.9 | 92.5 | 2.33  | 0.195 | 2400 | 2400 | 12   | 26389 |
| DMSO vs. Octopamine 1.7µM | 94.9 | 94   | 0.901 | 0.195 | 2400 | 2400 | 4.62 | 26389 |
| DMSO vs. Octopamine15µM   | 94.9 | 93.4 | 1.44  | 0.195 | 2400 | 2400 | 7.4  | 26389 |

## S2-ANOVA muscle tone

|                                                                   |          |  |  |  |  |  |  |  |
|-------------------------------------------------------------------|----------|--|--|--|--|--|--|--|
|                                                                   |          |  |  |  |  |  |  |  |
| Muscle tone                                                       |          |  |  |  |  |  |  |  |
|                                                                   |          |  |  |  |  |  |  |  |
| ANOVA summary                                                     |          |  |  |  |  |  |  |  |
| F                                                                 | 1490     |  |  |  |  |  |  |  |
| P value                                                           | < 0.0001 |  |  |  |  |  |  |  |
| P value summary                                                   | ****     |  |  |  |  |  |  |  |
| Are differences among means statistically significant? (P < 0.05) | Yes      |  |  |  |  |  |  |  |
| R square                                                          | 0.531    |  |  |  |  |  |  |  |

|                                                         |                 |                 |              |                      |            |  |  |  |
|---------------------------------------------------------|-----------------|-----------------|--------------|----------------------|------------|--|--|--|
| Brown-Forsythe test                                     |                 |                 |              |                      |            |  |  |  |
| F (DFn, DFd)                                            | 115 (10, 13178) |                 |              |                      |            |  |  |  |
| P value                                                 | < 0.0001        |                 |              |                      |            |  |  |  |
| P value summary                                         | ****            |                 |              |                      |            |  |  |  |
| Significantly different standard deviations? (P < 0.05) | Yes             |                 |              |                      |            |  |  |  |
|                                                         |                 |                 |              |                      |            |  |  |  |
| Bartlett's test                                         |                 |                 |              |                      |            |  |  |  |
| Bartlett's statistic (corrected)                        | 5274            |                 |              |                      |            |  |  |  |
| P value                                                 | < 0.0001        |                 |              |                      |            |  |  |  |
| P value summary                                         | ****            |                 |              |                      |            |  |  |  |
| Significantly different standard deviations? (P < 0.05) | Yes             |                 |              |                      |            |  |  |  |
|                                                         |                 |                 |              |                      |            |  |  |  |
| ANOVA table                                             | SS              | DF              | MS           | F (DFn, DFd)         | P value    |  |  |  |
| Treatment (between columns)                             | 59736           | 10              | 5974         | F (10, 13178) = 1490 | P < 0.0001 |  |  |  |
| Residual (within columns)                               | 52843           | 13178           | 4.01         |                      |            |  |  |  |
| Total                                                   | 112579          | 13188           |              |                      |            |  |  |  |
|                                                         |                 |                 |              |                      |            |  |  |  |
| Data summary                                            |                 |                 |              |                      |            |  |  |  |
| Number of treatments (columns)                          | 11              |                 |              |                      |            |  |  |  |
| Number of values (total)                                | 13189           |                 |              |                      |            |  |  |  |
|                                                         |                 |                 |              |                      |            |  |  |  |
|                                                         |                 |                 |              |                      |            |  |  |  |
| Number of families                                      | 1               |                 |              |                      |            |  |  |  |
| Number of comparisons per family                        | 10              |                 |              |                      |            |  |  |  |
| Alpha                                                   | 0.05            |                 |              |                      |            |  |  |  |
|                                                         |                 |                 |              |                      |            |  |  |  |
| Dunnett's multiple comparisons test                     | Mean Diff.      | 95% CI of diff. | Significant? | Summary              |            |  |  |  |

|                           |        |                  |            |             |      |      |      |       |
|---------------------------|--------|------------------|------------|-------------|------|------|------|-------|
| DMSO vs. Isoprotenerol    | -3.55  | -3.77 to -3.32   | Yes        | ****        |      |      |      |       |
| DMSO vs. Tyramine         | 1.15   | 0.925 to 1.37    | Yes        | ****        |      |      |      |       |
| DMSO vs. Salbutamol       | 3.22   | 3.00 to 3.44     | Yes        | ****        |      |      |      |       |
| DMSO vs. Epinastine       | 1.83   | 1.61 to 2.06     | Yes        | ****        |      |      |      |       |
| DMSO vs. Clonidine        | -0.806 | -1.03 to -0.584  | Yes        | ****        |      |      |      |       |
| DMSO vs. Prazosin         | 3.32   | 3.10 to 3.54     | Yes        | ****        |      |      |      |       |
| DMSO vs. Amitraz          | 0.624  | 0.402 to 0.846   | Yes        | ****        |      |      |      |       |
| DMSO vs. Octopamine 5µM   | -0.522 | -0.744 to -0.300 | Yes        | ****        |      |      |      |       |
| DMSO vs. Octopamine 1.7µM | 0.102  | -0.120 to 0.324  | No         | ns          |      |      |      |       |
| DMSO vs. Octopamine15µM   | -3.21  | -3.43 to -2.99   | Yes        | ****        |      |      |      |       |
|                           |        |                  |            |             |      |      |      |       |
|                           |        |                  |            |             |      |      |      |       |
| Test details              | Mean 1 | Mean 2           | Mean Diff. | SE of diff. | n1   | n2   | q    | DF    |
|                           |        |                  |            |             |      |      |      |       |
| DMSO vs. Isoprotenerol    | 98.9   | 102              | -3.55      | 0.0818      | 1199 | 1199 | 43.3 | 13178 |
| DMSO vs. Tyramine         | 98.9   | 97.7             | 1.15       | 0.0818      | 1199 | 1199 | 14   | 13178 |
| DMSO vs. Salbutamol       | 98.9   | 95.6             | 3.22       | 0.0818      | 1199 | 1199 | 39.3 | 13178 |
| DMSO vs. Epinastine       | 98.9   | 97               | 1.83       | 0.0818      | 1199 | 1199 | 22.4 | 13178 |
| DMSO vs. Clonidine        | 98.9   | 99.7             | -0.806     | 0.0818      | 1199 | 1199 | 9.85 | 13178 |
| DMSO vs. Prazosin         | 98.9   | 95.5             | 3.32       | 0.0818      | 1199 | 1199 | 40.6 | 13178 |
| DMSO vs. Amitraz          | 98.9   | 98.2             | 0.624      | 0.0818      | 1199 | 1199 | 7.63 | 13178 |
| DMSO vs. Octopamine 5µM   | 98.9   | 99.4             | -0.522     | 0.0818      | 1199 | 1199 | 6.38 | 13178 |
| DMSO vs. Octopamine 1.7µM | 98.9   | 98.8             | 0.102      | 0.0818      | 1199 | 1199 | 1.25 | 13178 |
| DMSO vs. Octopamine15µM   | 98.9   | 102              | -3.21      | 0.0818      | 1199 | 1199 | 39.2 | 13178 |





| Test details                    | Mean 1 | Mean 2 | Mean Diff. | SE of diff. | n1   | n2   | q    | DF    |
|---------------------------------|--------|--------|------------|-------------|------|------|------|-------|
|                                 |        |        |            |             |      |      |      |       |
| DMSO vs. Isoprotenerol          | 90.9   | 92.9   | -1.99      | 0.14        | 1201 | 1201 | 14.2 | 14400 |
| DMSO vs. Tyramine               | 90.9   | 79.7   | 11.2       | 0.14        | 1201 | 1201 | 79.6 | 14400 |
| DMSO vs. Salbutamol             | 90.9   | 83.1   | 7.75       | 0.14        | 1201 | 1201 | 55.3 | 14400 |
| DMSO vs. Epinastine             | 90.9   | 86.4   | 4.42       | 0.14        | 1201 | 1201 | 31.5 | 14400 |
| DMSO vs. Clonidine              | 90.9   | 88.3   | 2.55       | 0.14        | 1201 | 1201 | 18.2 | 14400 |
| DMSO vs. Prazosin               | 90.9   | 85     | 5.85       | 0.14        | 1201 | 1201 | 41.8 | 14400 |
| DMSO vs. Amitraz                | 90.9   | 88.4   | 2.45       | 0.14        | 1201 | 1201 | 17.5 | 14400 |
| DMSO vs. Octopamine 5 $\mu$ M   | 90.9   | 85.7   | 5.17       | 0.14        | 1201 | 1201 | 36.9 | 14400 |
| DMSO vs. Octopamine 1.7 $\mu$ M | 90.9   | 89.2   | 1.7        | 0.14        | 1201 | 1201 | 12.1 | 14400 |
| DMSO vs. Octopamine15 $\mu$ M   | 90.9   | 84.8   | 6.09       | 0.14        | 1201 | 1201 | 43.4 | 14400 |



#### S4-ANOVA effect of octopamine concentration

|                                                 |            |                 |              |             |      |      |      |      |
|-------------------------------------------------|------------|-----------------|--------------|-------------|------|------|------|------|
| Number of families                              | 1          |                 |              |             |      |      |      |      |
| Number of comparisons per family                | 3          |                 |              |             |      |      |      |      |
| Alpha                                           | 0.05       |                 |              |             |      |      |      |      |
|                                                 |            |                 |              |             |      |      |      |      |
| Tukey's multiple comparisons test               | Mean Diff. | 95% CI of diff. | Significant? | Summary     |      |      |      |      |
|                                                 |            |                 |              |             |      |      |      |      |
| Octopamine 5 $\mu$ M vs. Octopamine 1.7 $\mu$ M | -1.43      | -1.94 to -0.916 | Yes          | ****        |      |      |      |      |
| Octopamine 5 $\mu$ M vs. Octopamine15 $\mu$ M   | -0.886     | -1.40 to -0.374 | Yes          | ***         |      |      |      |      |
| Octopamine 1.7 $\mu$ M vs. Octopamine15 $\mu$ M | 0.542      | 0.0297 to 1.05  | Yes          | *           |      |      |      |      |
|                                                 |            |                 |              |             |      |      |      |      |
|                                                 |            |                 |              |             |      |      |      |      |
| Test details                                    | Mean 1     | Mean 2          | Mean Diff.   | SE of diff. | n1   | n2   | q    | DF   |
|                                                 |            |                 |              |             |      |      |      |      |
| Octopamine 5 $\mu$ M vs. Octopamine 1.7 $\mu$ M | 92.5       | 94              | -1.43        | 0.218       | 2400 | 2400 | 9.25 | 7197 |
| Octopamine 5 $\mu$ M vs. Octopamine15 $\mu$ M   | 92.5       | 93.4            | -0.886       | 0.218       | 2400 | 2400 | 5.74 | 7197 |
| Octopamine 1.7 $\mu$ M vs. Octopamine15 $\mu$ M | 94         | 93.4            | 0.542        | 0.218       | 2400 | 2400 | 3.51 | 7197 |
